# Supplementary material for: Italian validation of the Orbach and Mikulincer Mental Pain Scale-8 (OMMP-8)
Source: Springer Nature journal article supplement (doi:10.1186/s12991-025-00584-8), 2025-07-16
Supplement: MOESM1 [file 12991_2025_584_MOESM1_ESM.docx]

**Supplementary Materials – Table A**

*Means and Standard Deviations and Internal Consistency of the Italian OMMP-8 Total and Sub-Scales Split by Gender, Age, Treatment Status, and Suicidal Ideation.*

|  | Gender | |  | | Age | | | | | |  | Treatment status | | | |  | Suidical ideation | | |
| --- | --- | --- | --- | --- | --- | --- | --- | --- | --- | --- | --- | --- | --- | --- | --- | --- | --- | --- | --- |
|  | Male | Female | |  | | 18-30 | 31-45 | 46-85 |  | Currently in treatments | | | Not currently treatments |  | Current suicidal ideation | | | No current suicidal ideation |
|  | *M*(*SD*)/ ω | *M*(*SD*)/ ω | |  | | *M*(*SD*)/ ω | *M*(*SD*)/ ω | *M*(*SD*)/ ω |  | *M*(*SD*)/ ω | | | *M*(*SD)*/ ω |  | *M*(*SD*)/ ω | | | *M*(*SD)*/ ω |
| Mental pain | 23.28 (9.53)/.91 | 18.83 (7.57)/.89 | |  | | 19.79 (7.47)/.90 | 17.72 (7.68)/.89 | 15.14 6.75)/.89 |  | 20.06 (7.64)/.89 | | | 18.06 (7.53)/.90 |  | 24.58 (7.23)/.87 | | | 16.08 (6.26)/.86 |
| Irreversibility | 5.67 (3.34)/.79 | 4.61 (2.43)/.83 | |  | | 4.72 (2.40)/.85 | 4.45 (2.48)/.79 | 4.07 (2.26)/.77 |  | 5.02 (2.59)/.85 | | | 4.39 (2.31)/.82 |  | 6.32 (2.37)/.81 | | | 3.82 (2.00)/.76 |
| Emotional Flooding | 9.28 (3.36)/.87 | 8.50 (3.40)/.84 | |  | | 8.93 (3.25)/.83 | 7.96 (3.67)/.89 | 6.42 (3.04)/.80 |  | 9.04 (3.34)/.83 | | | 8.03 (3.42)/.85 |  | 10.29 (3.07)/.80 | | | 7.46 (3.23)/.83 |
| Narcissistic Wounds | 8.33 (4.01)/.88 | 5.72 (3.06)/.88 | |  | | 6.15 (3.11)/.88 | 5.30 (3.03)/.87 | 4.65 (2.68)/.87 |  | 6.01 (3.16)/.88 | | | 5.62 (3.05)/.88 |  | 7.97 (3.37)/.85 | | | 4.80 (2.42)/.84 |

*Note*. ω = observed McDonald’s omega.
